# Supplementary material for: Identifying Blood Biomarkers and Physiological Processes That Distinguish Humans with Superior Performance under Psychological Stress
Source: PLOS journal article supplement (doi:10.1371/journal.pone.0008371), 2009-12-17
Supplement: S4 (10.1371/journal.pone.0008371.s004) [file journal.pone.0008371.s004]

**Table S1. Differentially Expressed Proteins****Proteins Up-regulated in Low-Scorers Compared to High-Scorers**

| <b>Genbank Accession</b> | <b>Protein Name</b>                                                               |
|--------------------------|-----------------------------------------------------------------------------------|
| NP_001605                | actin, gamma 1 propeptide                                                         |
| NP_001636                | apolipoprotein C-I                                                                |
| NP_000479                | serpin peptidase inhibitor, clade C, member 1                                     |
| NP_001228                | cyclin A                                                                          |
| NP_000496                | coagulation factor XII                                                            |
| NP_002206                | inter-alpha (globulin) inhibitor H1                                               |
| NP_002903                | DNA polymerase zeta                                                               |
| NP_002968                | sodium channel, voltage-gated, type IX, alpha                                     |
| NP_003183                | beta-tubulin cofactor C                                                           |
| NP_000033                | apolipoprotein H                                                                  |
| NP_000046                | butyrylcholinesterase                                                             |
| NP_000087                | ceruloplasmin                                                                     |
| NP_000056                | complement component 6                                                            |
| NP_004920                | calbindin 1                                                                       |
| NP_004961                | insulin-like growth factor binding protein, acid labile subunit isoform 2         |
| NP_005413                | tectorin alpha                                                                    |
| NP_006854                | leukocyte immunoglobulin-like receptor, subfamily A (with TM domain), member 1    |
| NP_055488                | tetratricopeptide repeat domain 35                                                |
| NP_055710                | KIAA1009 protein                                                                  |
| NP_060570                | EF-hand domain (C-terminal) containing 1                                          |
| NP_065169                | sal-like 4                                                                        |
| NP_000604                | hemopexin                                                                         |
| NP_002454                | myxovirus resistance protein 2                                                    |
| NP_079221                | RMI1, RecQ mediated genome instability 1, homolog                                 |
| NP_079222                | hypothetical protein LOC80011                                                     |
| NP_116194                | zinc finger and SCAN domain containing 10                                         |
| NP_000054                | complement component 2 isoform 1                                                  |
| NP_001924                | dihydrolipoamide S-succinyltransferase (E2 component of 2-oxo-glutarate complex)  |
| NP_055253                | interleukin 1 family, member 8 isoform 1                                          |
| NP_620135                | synaptotagmin-like 5 isoform 1                                                    |
| NP_663318                | apolipoprotein L1 isoform b                                                       |
| NP_061974                | apolipoprotein M                                                                  |
| NP_690595                | RNA binding motif protein 10 isoform 2                                            |
| NP_059136                | mouse Mdm1 nuclear protein homolog isoform 1                                      |
| NP_002882                | Ras protein-specific guanine nucleotide-releasing factor 1 isoform 1              |
| NP_116168                | coiled-coil domain containing 142                                                 |
| NP_116107                | major facilitator superfamily domain containing 9                                 |
| NP_060808                | WD repeat domain 52 isoform 2                                                     |
| NP_066267                | ankyrin 3 isoform 1                                                               |
| NP_004136                | myosin IXB isoform 1                                                              |
| NP_009086                | zona pellucida glycoprotein 3 isoform 2                                           |
| NP_958850                | complement component 1, s subcomponent                                            |
| NP_976053                | hypothetical protein LOC399670                                                    |
| NP_055790                | microtubule associated serine/threonine kinase 1                                  |
| NP_060020                | mesoderm induction early response 1, family member 2                              |
| NP_068810                | v-rel reticuloendotheliosis viral oncogene homolog A isoform 1                    |
| NP_703144                | killer cell immunoglobulin-like receptor, three domains, long cytoplasmic tail, 3 |
| NP_079146                | DEP domain containing 2 isoform a                                                 |
| NP_778228                | pleckstrin homology domain containing, family A member 7                          |
| NP_997544                | zinc finger CCCH-type containing 14 isoform 3                                     |
| NP_955384                | putative UST1-like organic anion transporter                                      |
| NP_060024                | poly (ADP-ribose) polymerase family, member 14                                    |
| NP_001004060             | nodal modulator 2 isoform 1                                                       |
| NP_001862                | pancreatic carboxypeptidase B1                                                    |
| NP_001007526             | NACHT and WD repeat domain containing 1                                           |

|              |                                                                             |
|--------------|-----------------------------------------------------------------------------|
| NP_001011553 | cell division cycle 10 isoform 2                                            |
| NP_000005    | alpha-2-macroglobulin                                                       |
| NP_000664    | class IV alcohol dehydrogenase, mu or sigma subunit                         |
| NP_000473    | apolipoprotein A-IV                                                         |
| NP_001028725 | spectrin domain with coiled-coils 1 NSP5b3b                                 |
| NP_001030598 | general transcription factor IIIC, polypeptide 2, beta 110kDa               |
| NP_006022    | pericentrin                                                                 |
| NP_659473    | coiled-coil domain containing 46 isoform a                                  |
| NP_056988    | eukaryotic translation initiation factor 5B                                 |
| NP_060244    | CDK5 regulatory subunit associated protein 1-like 1                         |
| NP_002967    | sodium channel, voltage-gated, type VII, alpha                              |
| NP_000795    | folate receptor 3                                                           |
| XP_001132268 | PREDICTED: hypothetical protein                                             |
| XP_001128594 | PREDICTED: hypothetical protein                                             |
| XP_001126166 | PREDICTED: similar to MUC19                                                 |
| XP_062871    | PREDICTED: similar to Temporarily Assigned Gene name family member (tag-58) |
| XP_001129821 | PREDICTED: hypothetical protein                                             |
| XP_001132605 | PREDICTED: hypothetical protein                                             |
| NP_079052    | NKF3 kinase family member                                                   |
| XP_001129553 | PREDICTED: hypothetical protein                                             |
| XP_001129374 | PREDICTED: hypothetical protein                                             |
| NP_001846    | alpha 1 type XV collagen                                                    |
| NP_207837    | cell recognition protein CASPR4 isoform 1                                   |
| NP_113665    | yippee-like 3 isoform 1                                                     |
| NP_689472    | leucine-rich repeat kinase 1                                                |
| NP_114141    | hemicentin 1                                                                |
| NP_057232    | SH3 and multiple ankyrin repeat domains 1                                   |
| NP_940864    | doublecortin domain containing 5                                            |
| NP_001073867 | KIAA0368 protein                                                            |
| NP_001074008 | coiled-coil domain containing 150                                           |
| NP_003913    | hect domain and RCC1-like domain 1                                          |
| NP_997246    | Nck-associated protein 5 isoform 1                                          |
| NP_001124    | afamin                                                                      |
| NP_001869    | cellular retinoic acid binding protein 2                                    |
| NP_000497    | coagulation factor II                                                       |
| NP_000403    | histidine-rich glycoprotein                                                 |
| NP_000599    | orosomucoid 2                                                               |
| NP_000292    | plasminogen                                                                 |
| NP_000030    | apolipoprotein A-I                                                          |
| NP_006813    | RAB40B, member RAS oncogene family                                          |
| NP_055722    | FERM and PDZ domain containing 1                                            |
| NP_057257    | HemK methyltransferase family member 1                                      |
| NP_064528    | partner of NOB1                                                             |
| NP_079182    | stearoyl-CoA desaturase 5 isoform b                                         |
| NP_036290    | F-box and leucine-rich repeat protein 3                                     |
| NP_570602    | alpha 1B-glycoprotein                                                       |
| NP_009060    | zinc finger protein of the cerebellum 2                                     |
| NP_689865    | zinc finger protein 48                                                      |
| NP_002462    | myosin heavy chain 6                                                        |
| NP_002209    | inter-alpha (globulin) inhibitor H4                                         |
| NP_000574    | vitamin D-binding protein                                                   |
| NP_009201    | FK506 binding protein 9                                                     |
| NP_061875    | ETAA16 protein                                                              |
| NP_001726    | complement component 5                                                      |
| NP_937895    | gelsolin isoform b                                                          |
| NP_942559    | prickle-like 2                                                              |
| NP_997647    | fibronectin 1 isoform 1                                                     |
| NP_476508    | alpha 3 type VI collagen isoform 5                                          |

|              |                                                                             |
|--------------|-----------------------------------------------------------------------------|
| NP_006735    | retinol-binding protein 4, plasma                                           |
| NP_006581    | ubiquitin specific protease 39                                              |
| NP_009224    | complement component 4A                                                     |
| NP_001701    | complement factor B                                                         |
| NP_068838    | zinc finger protein 711                                                     |
| NP_002207    | inter-alpha globulin inhibitor H2 polypeptide                               |
| NP_065869    | hypothetical protein LOC57578                                               |
| NP_000883    | plasma kallikrein B1                                                        |
| NP_055836    | zinc finger protein 292                                                     |
| XP_950677    | PREDICTED: hypothetical protein                                             |
| NP_150229    | ATP-binding cassette protein C12                                            |
| NP_002152    | isoleucine tRNA synthetase                                                  |
| NP_004992    | NADH dehydrogenase (ubiquinone) 1 alpha subcomplex, 7, 14.5kDa              |
| NP_000375    | apolipoprotein B                                                            |
| NP_006505    | sodium channel, voltage-gated, type X, alpha                                |
| NP_001026    | cardiac muscle ryanodine receptor                                           |
| NP_055646    | lupus brain antigen 1                                                       |
| XP_001128246 | PREDICTED: hypothetical protein                                             |
| XP_942645    | PREDICTED: similar to Temporarily Assigned Gene name family member (tag-58) |
| NP_056936    | zinc finger protein 117                                                     |
| NP_000055    | complement component 3                                                      |
| NP_536350    | GNAS complex locus XLas                                                     |
| NP_001073347 | cyclic nucleotide gated channel alpha 3 isoform 2                           |

#### Proteins Down-Regulated in Low-Scorers Compared to High-Scorers

| Genbank Accession | Protein Name                                           |
|-------------------|--------------------------------------------------------|
| NP_003562         | phakinin                                               |
| NP_005856         | protease, serine, 16                                   |
| NP_036553         | rearranged L-myc fusion                                |
| NP_055766         | zinc finger protein 365 isoform A                      |
| NP_077015         | caspase recruitment domain protein 14 isoform 1        |
| NP_114432         | BRCA1 interacting protein C-terminal helicase 1        |
| NP_647538         | attractin isoform 2                                    |
| NP_659434         | folliculin isoform 1                                   |
| NP_689426         | p53 target zinc finger protein isoform 2               |
| NP_703149         | extraembryonic, spermatogenesis, homeobox 1-like       |
| NP_705835         | luman-recruiting factor                                |
| NP_055904         | p53-associated parkin-like cytoplasmic protein         |
| NP_751950         | interleukin 15 receptor, alpha isoform 2               |
| NP_003598         | CDC42-binding protein kinase alpha isoform B           |
| NP_003713         | tumor protein p63 isoform 1                            |
| NP_938204         | c-Maf-inducing protein isoform C-mip                   |
| NP_940818         | chromatin modifying protein 2A                         |
| NP_942596         | zinc finger protein 160                                |
| NP_945346         | hypothetical protein LOC374864 isoform 2               |
| NP_055548         | zinc finger, FYVE domain containing 16                 |
| NP_694574         | Nedd4 binding protein 1                                |
| NP_006827         | GCN1 general control of amino-acid synthesis 1-like 1  |
| NP_001973         | erbB-3 isoform 1                                       |
| NP_001011649      | CDK5 regulatory subunit associated protein 2 isoform b |
| NP_055516         | SECIS binding protein 2-like                           |
| NP_006488         | hypermethylated in cancer 1 isoform 1                  |
| NP_067072         | sorting nexin 6 isoform a                              |
| XP_935700         | PREDICTED: hypothetical protein                        |
| XP_949623         | PREDICTED: hypothetical protein                        |
| NP_079421         | hypothetical protein LOC80217                          |
| XP_001127275      | PREDICTED: immunoresponsive 1 homolog (mouse)          |
| NP_055885         | zinc finger CCCH-type containing 13                    |

|              |                                                                                         |
|--------------|-----------------------------------------------------------------------------------------|
| NP_006693    | patatin-like phospholipase domain containing 6                                          |
| NP_689594    | xin actin-binding repeat containing 2 isoform 1                                         |
| NP_055845    | furry-like                                                                              |
| NP_001638    | apolipoprotein D                                                                        |
| NP_002590    | phosphodiesterase 2A isoform 1                                                          |
| NP_002821    | protein tyrosine phosphatase, non-receptor type 4                                       |
| NP_002890    | retinol binding protein 1, cellular isoform a                                           |
| NP_113628    | transmembrane protein 7                                                                 |
| NP_002060    | guanine nucleotide binding protein (G protein), alpha inhibiting activity polypeptide 1 |
| NP_940959    | RNA binding motif protein 43                                                            |
| NP_055073    | synaptonemal complex protein 2                                                          |
| NP_005838    | solute carrier family 23 (nucleobase transporters), member 1 isoform a                  |
| NP_005086    | zinc finger protein 262                                                                 |
| NP_000414    | keratin 2                                                                               |
| NP_001001894 | tetratricopeptide repeat domain 3                                                       |

#### Proteins Up-Regulated in Median-Scorers Compared to High Scorers

| Genbank Accession | Protein Name                                                   |
|-------------------|----------------------------------------------------------------|
| NP_001124         | afamin                                                         |
| NP_001638         | apolipoprotein D                                               |
| NP_001869         | cellular retinoic acid binding protein 2                       |
| NP_000497         | coagulation factor II                                          |
| NP_000403         | histidine-rich glycoprotein                                    |
| NP_000599         | orosomucoid 2                                                  |
| NP_000292         | plasminogen                                                    |
| NP_000030         | apolipoprotein A-I                                             |
| NP_006813         | RAB40B, member RAS oncogene family                             |
| NP_055722         | FERM and PDZ domain containing 1                               |
| NP_057257         | HemK methyltransferase family member 1                         |
| NP_064528         | partner of NOB1                                                |
| NP_079182         | stearoyl-CoA desaturase 5 isoform b                            |
| NP_036290         | F-box and leucine-rich repeat protein 3                        |
| NP_570602         | alpha 1B-glycoprotein                                          |
| NP_009060         | zinc finger protein of the cerebellum 2                        |
| NP_689865         | zinc finger protein 48                                         |
| NP_002462         | myosin heavy chain 6                                           |
| NP_002209         | inter-alpha (globulin) inhibitor H4                            |
| NP_000574         | vitamin D-binding protein                                      |
| NP_009201         | FK506 binding protein 9                                        |
| NP_061875         | ETAA16 protein                                                 |
| NP_001726         | complement component 5                                         |
| NP_937895         | gelsolin isoform b                                             |
| NP_942559         | prickle-like 2                                                 |
| NP_997647         | fibronectin 1 isoform 1                                        |
| NP_476508         | alpha 3 type VI collagen isoform 5                             |
| NP_006735         | retinol-binding protein 4, plasma                              |
| NP_009224         | complement component 4A                                        |
| NP_001701         | complement factor B                                            |
| NP_068838         | zinc finger protein 711                                        |
| NP_002207         | inter-alpha globulin inhibitor H2 polypeptide                  |
| NP_065869         | hypothetical protein LOC57578                                  |
| NP_000883         | plasma kallikrein B1                                           |
| NP_055836         | zinc finger protein 292                                        |
| XP_950677         | PREDICTED: hypothetical protein                                |
| NP_150229         | ATP-binding cassette protein C12                               |
| NP_002152         | isoleucine tRNA synthetase                                     |
| NP_004992         | NADH dehydrogenase (ubiquinone) 1 alpha subcomplex, 7, 14.5kDa |
| NP_000375         | apolipoprotein B                                               |

|              |                                                                             |
|--------------|-----------------------------------------------------------------------------|
| NP_006505    | sodium channel, voltage-gated, type X, alpha                                |
| NP_001026    | cardiac muscle ryanodine receptor                                           |
| NP_055646    | lupus brain antigen 1                                                       |
| XP_001128246 | PREDICTED: hypothetical protein                                             |
| XP_942645    | PREDICTED: similar to Temporarily Assigned Gene name family member (tag-58) |
| NP_056936    | zinc finger protein 117                                                     |
| NP_000055    | complement component 3                                                      |
| NP_536350    | GNAS complex locus XLas                                                     |
| NP_001073347 | cyclic nucleotide gated channel alpha 3 isoform 2                           |
| NP_001609    | poly (ADP-ribose) polymerase family, member 1                               |
| NP_001366    | deoxyribonuclease II, lysosomal                                             |
| NP_002046    | glial fibrillary acidic protein isoform 1                                   |
| NP_000884    | kininogen 1 isoform 2                                                       |
| NP_002639    | non-specific serine/threonine protein kinase                                |
| NP_000362    | transthyretin                                                               |
| NP_000020    | angiotensinogen                                                             |
| NP_000057    | complement component 8, beta polypeptide                                    |
| NP_004681    | LATS homolog 1                                                              |
| NP_004522    | molybdopterin synthase large subunit MOCS2B                                 |
| NP_005601    | retinoblastoma binding protein 4 isoform a                                  |
| NP_006210    | catalytic phosphatidylinositol 3-kinase beta                                |
| NP_001966    | enolase 2                                                                   |
| NP_037398    | catenin, alpha 3                                                            |
| NP_055532    | zinc finger protein 536                                                     |
| NP_057270    | serine (or cysteine) proteinase inhibitor, clade A, member 10               |
| NP_000598    | orosomucoid 1                                                               |
| NP_064576    | mitochondrial ribosomal protein S22                                         |
| NP_005680    | ATP-binding cassette, sub-family B, member 6                                |
| NP_067039    | zinc finger protein 71                                                      |
| NP_003277    | DNA topoisomerase I                                                         |
| NP_061819    | N-acetylneuraminic acid phosphate synthase                                  |
| NP_073737    | axotrophin                                                                  |
| NP_001399    | cadherin EGF LAG seven-pass G-type receptor 2                               |
| NP_116562    | serine/threonine kinase 31 isoform b                                        |
| NP_071407    | cadherin-like 23 isoform 1                                                  |
| NP_438171    | coronin, actin binding protein, 2A                                          |
| NP_612121    | G6B protein isoform G6b-G                                                   |
| NP_054768    | acyl-Coenzyme A dehydrogenase family, member 9                              |
| NP_057032    | solute carrier family 35, member B3                                         |
| NP_003600    | HIRA interacting protein 3                                                  |
| NP_071394    | claspin                                                                     |
| NP_683721    | phosphatidylinositol glycan anchor biosynthesis, class Q isoform 1          |
| NP_690042    | testin isoform 2                                                            |
| NP_056292    | transcriptional co-repressor Sin3A                                          |
| NP_037436    | zinc finger, DHHC-type containing 1                                         |
| NP_060439    | IWS1 homolog                                                                |
| NP_065868    | hypothetical protein LOC57577                                               |
| NP_065941    | p90 autoantigen                                                             |
| NP_777618    | ATPase, Ca <sup>++</sup> transporting, ubiquitous isoform c                 |
| NP_789847    | PDZ and LIM domain 2 isoform 1                                              |
| NP_065825    | mindbomb homolog 1                                                          |
| NP_653266    | sestrin 3                                                                   |
| NP_066278    | macrophage stimulating 1 (hepatocyte growth factor-like)                    |
| NP_663327    | scavenger receptor class F, member 1 isoform 5                              |
| NP_004635    | adaptor-related protein complex 3, beta 2 subunit                           |
| NP_031394    | RAS p21 protein activator 3                                                 |
| NP_942127    | ATP citrate lyase isoform 2                                                 |
| NP_065826    | hypothetical protein LOC57535                                               |

|              |                                                                                        |
|--------------|----------------------------------------------------------------------------------------|
| NP_075561    | hypothetical protein LOC65250                                                          |
| NP_839943    | IQ motif containing GTPase activating protein 3                                        |
| NP_065931    | zinc finger protein 530                                                                |
| NP_009049    | triple functional domain (PTPRF interacting)                                           |
| NP_112582    | pseudouridylate synthase 7 homolog (S. cerevisiae)-like                                |
| NP_001001583 | phosphodiesterase 9A isoform o                                                         |
| NP_203751    | FH2 domain containing 1                                                                |
| NP_001003722 | GLE1 RNA export mediator homolog isoform 1                                             |
| NP_000029    | adenomatous polyposis coli                                                             |
| NP_055413    | suppressor of cytokine signaling 7                                                     |
| NP_065789    | kinase D-interacting substrate of 220 kDa                                              |
| NP_996830    | transient receptor potential cation channel, subfamily M, member 3 isoform g           |
| NP_689854    | AT rich interactive domain 2 (ARID, RFX-like)                                          |
| NP_055871    | ribosomal RNA processing 1 homolog B                                                   |
| NP_001012300 | microspherule protein 1 isoform 2                                                      |
| NP_000177    | complement factor H isoform a                                                          |
| NP_001017969 | hypothetical protein LOC158358                                                         |
| NP_001724    | complement component 1, r subcomponent                                                 |
| NP_056261    | transcription factor ELYS                                                              |
| NP_055939    | death-inducing-protein                                                                 |
| NP_115587    | lysyl oxidase-like 4                                                                   |
| NP_002854    | liver glycogen phosphorylase isoform 1                                                 |
| NP_775864    | beta 1,4-N-acetylgalactosaminyltransferase-transferase 3                               |
| NP_006176    | nuclear mitotic apparatus protein 1                                                    |
| NP_060542    | protein BAP28                                                                          |
| NP_001029288 | eukaryotic translation initiation factor 2B, subunit 4 delta isoform 2                 |
| NP_001032221 | centrobin, centrosomal BRCA2 interacting protein isoform beta                          |
| NP_570856    | ATPase, H+ transporting, lysosomal V0 subunit a4                                       |
| NP_689484    | LON peptidase N-terminal domain and ring finger 1                                      |
| XP_948701    | PREDICTED: hypothetical protein                                                        |
| NP_001099041 | dehydrogenase/reductase (SDR family) member 7C                                         |
| NP_038477    | bromodomain adjacent to zinc finger domain, 2A                                         |
| NP_001035197 | mutL homolog 3 isoform 1                                                               |
| NP_055333    | zinc finger protein 229                                                                |
| NP_001035881 | zinc finger protein 596                                                                |
| NP_001092688 | RAD51 associated protein 2                                                             |
| XP_944674    | PREDICTED: similar to mCG140660                                                        |
| XP_001132038 | PREDICTED: hypothetical protein                                                        |
| NP_056073    | FK506 binding protein 15, 133kDa                                                       |
| XP_001130382 | PREDICTED: similar to Mucin-5AC                                                        |
| XP_001129065 | PREDICTED: similar to Opioid growth factor receptor (OGFr) (Zeta-type opioid receptor) |
| NP_060770    | zinc finger protein 83 isoform a                                                       |
| XP_001132875 | PREDICTED: hypothetical protein                                                        |
| NP_004534    | nebulin isoform 3                                                                      |
| NP_689810    | fibrous sheath interacting protein 1                                                   |
| NP_115667    | SH3-domain GRB2-like (endophilin) interacting protein 1                                |
| NP_006303    | nuclear receptor co-repressor 2 isoform 1                                              |
| NP_689561    | WD repeat domain 81 isoform 2                                                          |
| NP_036442    | kinesin family member 4                                                                |
| NP_004183    | acetylserotonin O-methyltransferase-like                                               |
| NP_000195    | complement factor I                                                                    |
| NP_004110    | fms-related tyrosine kinase 3                                                          |
| NP_659410    | DENN/MADD domain containing 5B                                                         |
| NP_001073960 | USP6 N-terminal like isoform 2                                                         |
| NP_001073982 | carboxypeptidase N, polypeptide 2                                                      |
| NP_758439    | exonuclease GOR                                                                        |
| NP_002208    | inter-alpha (globulin) inhibitor H3                                                    |

**Proteins Down-Regulated in Median-Scorers Compared to High-Scorers**

| <b>Genbank Accession</b> | <b>Protein Name</b>                                                                              |
|--------------------------|--------------------------------------------------------------------------------------------------|
| NP_002590                | phosphodiesterase 2A isoform 1                                                                   |
| NP_002821                | protein tyrosine phosphatase, non-receptor type 4                                                |
| NP_002890                | retinol binding protein 1, cellular isoform a                                                    |
| NP_113628                | transmembrane protein 7                                                                          |
| NP_002060                | guanine nucleotide binding protein (G protein), alpha inhibiting activity polypeptide 1          |
| NP_940959                | RNA binding motif protein 43                                                                     |
| NP_055073                | synaptonemal complex protein 2                                                                   |
| NP_005838                | solute carrier family 23 (nucleobase transporters), member 1 isoform a                           |
| NP_005086                | zinc finger protein 262                                                                          |
| NP_000414                | keratin 2                                                                                        |
| NP_001001894             | tetratricopeptide repeat domain 3                                                                |
| NP_006581                | ubiquitin specific protease 39                                                                   |
| NP_002490                | neogenin homolog 1                                                                               |
| NP_003623                | contactin associated protein 1                                                                   |
| NP_002920                | rhodopsin kinase                                                                                 |
| NP_000071                | nicotinic acetylcholine receptor epsilon polypeptide                                             |
| NP_005621                | solute carrier organic anion transporter family, member 2A1                                      |
| NP_055269                | sestrin 1                                                                                        |
| NP_068598                | FAST kinase domains 5                                                                            |
| NP_075066                | mitochondrial ribosomal protein L44                                                              |
| NP_116215                | solute carrier family 35, member B4                                                              |
| NP_612569                | B-cell CLL/lymphoma 11A isoform 3                                                                |
| NP_060478                | FEZ family zinc finger 2                                                                         |
| NP_004265                | A-kinase anchor protein 6                                                                        |
| NP_689983                | hypothetical protein LOC255119                                                                   |
| NP_003161                | suppressor of Ty 6 homolog                                                                       |
| NP_443732                | testis-specific serine kinase 2                                                                  |
| NP_005905                | minichromosome maintenance complex component 4                                                   |
| NP_940962                | lipoma HMGIC fusion partner-like 4                                                               |
| NP_056323                | TCDD-inducible poly(ADP-ribose) polymerase                                                       |
| NP_003631                | inhibitor of kappa light polypeptide gene enhancer in B-cells, kinase complex-associated protein |
| NP_036548                | RAN binding protein 6                                                                            |
| NP_056256                | olfactomedin-like 2B                                                                             |
| NP_434700                | caspase recruitment domain protein 9 isoform 1                                                   |
| NP_003950                | huntingtin interacting protein-1-related                                                         |
| NP_065778                | zinc finger protein 295 isoform L                                                                |
| NP_777601                | scavenger receptor cysteine-rich type 1                                                          |
| NP_981949                | adenosine monophosphate deaminase 2 (isoform L) isoform 3                                        |
| NP_006222                | DNA-directed DNA polymerase epsilon                                                              |
| NP_057159                | vacuolar protein sorting 36                                                                      |
| NP_001026887             | cysteine-rich with EGF-like domains 1 isoform 1                                                  |
| NP_001029366             | exosome component 9 isoform 1                                                                    |
| XP_948609                | PREDICTED: hypothetical protein                                                                  |
| NP_542789                | transmembrane cochlear-expressed protein 2                                                       |
| NP_001036064             | v-erb-a erythroblastic leukemia viral oncogene homolog 4 isoform JM-a/CVT-2                      |
| NP_056083                | DnaJ (Hsp40) homolog, subfamily C, member 13                                                     |
| XP_001126010             | PREDICTED: hypothetical protein LOC23514                                                         |
| XP_001126422             | PREDICTED: hypothetical protein                                                                  |
| XP_948838                | PREDICTED: hypothetical protein                                                                  |
| NP_001837                | alpha 2 type IV collagen                                                                         |
| NP_115541                | leucine-rich repeats and IQ motif containing 1 isoform 2                                         |
